# Supplementary material for: Knock Out of CGN and CGNL1 in MDCK Cells Affects Claudin-2 but Has a Minor Impact on Tight Junction Barrier Function
Source: MDPI journal article supplement (doi:10.3390/cells12152004), 2023-08-05
Supplement: s1 [file s1]

# SUPPLEMENTARY MATERIAL

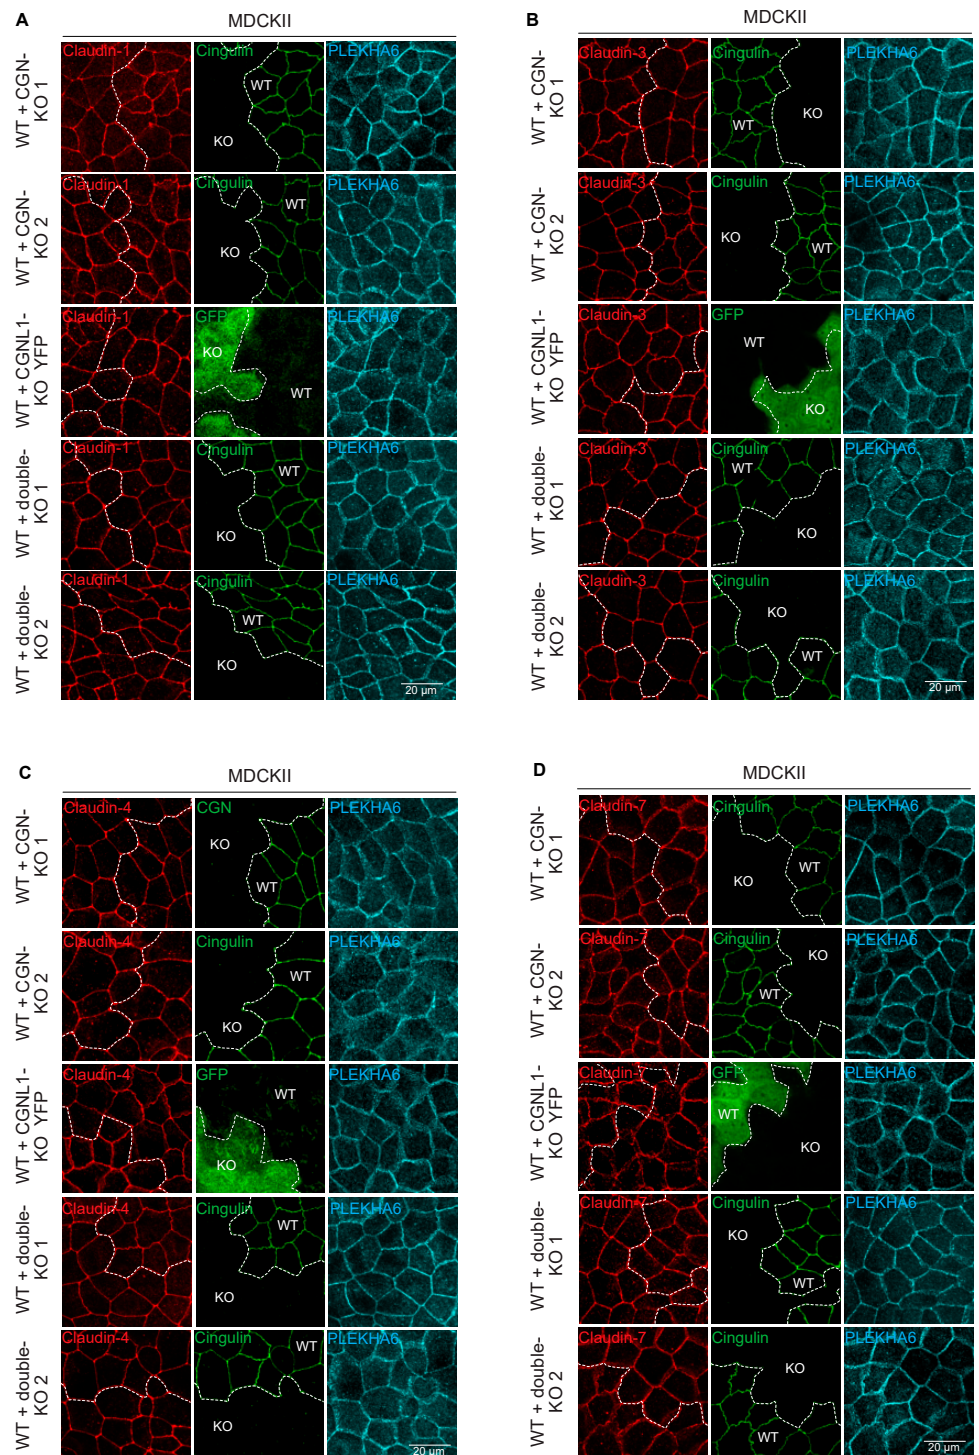

**Figure S1.** The junctional localization of claudins -1, -3, -4, -7 is not affected by the KO of either CGN, CGNL1 or both in MDCK cells. (A-D). IF microscopy analysis of endogenous claudin-1 (A), claudin-3 (B), claudin-4 (C) and claudin-7 (D) (red) at junctions of mixed cultures of WT cells, and cells KO either for CGN, CGNL1 or both. KO cells were identified either by lack of CGN labeling or by cytoplasmic GFP (green). PLEKHA6 was used as junctional marker reference. Dotted lines mark the border between WT and KO cells. Scale bar = 20  $\mu$ m.

**Table S1.** Resources table.

| Reagents and resources                                 | Source                   | Identifier                           |
|--------------------------------------------------------|--------------------------|--------------------------------------|
| <b>Antibodies</b>                                      |                          |                                      |
| Rabbit polyclonal anti-cingulin (IB, IF)               | Citilab                  | C532                                 |
| Rabbit polyclonal anti-paracingulin (IB)               | Citilab                  | 20893                                |
| Mouse monoclonal anti- $\beta$ -tubulin (IB)           | Thermo Fisher Scientific | Cat# 32-2600<br>RRID: AB_2533072     |
| Mouse monoclonal anti-Claudin-2 (IB, IF)               | Thermo Fisher Scientific | Cat# 32-5600<br>RRID: AB_2533085     |
| Rabbit polyclonal anti-Claudin-3 (IB)                  | Thermo Fisher Scientific | Cat# 34-1700<br>RRID: AB_2533158     |
| Mouse monoclonal anti-Claudin-4 (IB)                   | Thermo Fisher Scientific | Cat# 32-9400<br>RRID: AB_2533096     |
| Rabbit polyclonal anti-Claudin-7 (IB)                  | Thermo Fisher Scientific | Cat# 34-9100<br>RRID: AB_2533190     |
| Rabbit polyclonal anti-GFP (IF)                        | Thermo Fisher Scientific | Cat# A-11122<br>RRID: AB_221569      |
| Rabbit polyclonal anti-myc (IF)                        | Sigma-Aldrich/Merck      | Cat# 06-549<br>RRID:                 |
| Rat polyclonal anti- $\text{PLEKHA6}$ (IF)             | [1]                      | RtSZR127                             |
| Cy3-AffiniPure Donkey anti-Mouse IgG                   | Jackson Laboratory       | Cat# 715-165-151<br>RRID: AB_2315777 |
| Cy3-AffiniPure Donkey anti-Rat IgG                     | Jackson Laboratory       | Cat# 712-166-150<br>RRID: AB_2340668 |
| Alexa Fluor 488-AffiniPure Donkey anti-Rabbit IgG      | Jackson Laboratory       | Cat# 711-545-152<br>RRID: AB_2313584 |
| Cy5-AffiniPure Donkey anti-Rat IgG                     | Jackson Laboratory       | Cat# 712-175-153<br>RRID: AB_2340672 |
| Cy5-AffiniPure Donkey anti-Mouse IgG                   | Jackson Laboratory       | Cat# 715-175-150<br>RRID: AB_2340819 |
| Anti-mouse IgG (H+L), HRP Conjugate                    | Promega                  | Cat# W4021<br>RRID: AB_430834        |
| Anti-rabbit IgG (H+L), HRP Conjugate                   | Promega                  | Cat# W4011<br>RRID: AB_430833        |
| <b>Plasmids</b>                                        |                          |                                      |
| pCDNA3.1(-)-eGFP-myc-his                               | [2]                      | S1166                                |
| pCDNA3.1(+)-myc-hZO-1-FL-HA                            | [3]                      | S1947                                |
| pCDNA3.1(-)-eGFP-cCGN-FL-myc                           | [4]                      | S1115                                |
| pCDNA3.1(-)-eGFP-cCGNL1-FL-myc                         | [4]                      | S1148                                |
| <b>Chemicals, Reagents, Critical commercial assays</b> |                          |                                      |
| Pierce Protease Inhibitor Tablet, EDTA-free            | Thermo Scientific        | Cat# A32965                          |
| jetOPTIMUS                                             | Polyplus                 | Cat# 117-15                          |
| Hanks buffer                                           | Gibco                    | Cat# 14025-050                       |
| 3 kDa fluorescein-dextran                              | Invitrogen               | Cat# D3305                           |
| $\text{Ca}^{2+}$ -free DPBS                            | Gibco                    | Cat# 14190-094                       |
| S-MEM (Gibco, #11380-037)                              | Gibco                    | Cat# 11380-037                       |

|                                                              |                                            |                                                                                                                                           |
|--------------------------------------------------------------|--------------------------------------------|-------------------------------------------------------------------------------------------------------------------------------------------|
| Amiloride                                                    | Sigma-Aldrich/Merck                        | Cat# A-7410                                                                                                                               |
| DIDS                                                         | Sigma-Aldrich/Merck                        | Cat#D3514                                                                                                                                 |
| NucleoSpin® RNA kit                                          | Macherey-Nagel                             | Cat# 740955.50                                                                                                                            |
| Pierce BCA Protein assay kit                                 | Thermo Scientific                          | Cat# 23225                                                                                                                                |
| WesternBright ECL kit                                        | Advansta                                   | Cat# K-12045-D50                                                                                                                          |
| <b>Experimental models: Cell lines</b>                       |                                            |                                                                                                                                           |
| MDCK (Madin-Darby Canine Kidney) Tet-Off                     | A Fanning,<br>University of North Carolina | Clontech                                                                                                                                  |
| MDCK (Madin-Darby Canine Kidney) Tet-Off CGN-KO              | [5]                                        | N/A                                                                                                                                       |
| MDCK (Madin-Darby Canine Kidney) Tet-Off CGNL1-KO-YFP-myc    | [5]                                        | N/A                                                                                                                                       |
| MDCK (Madin-Darby Canine Kidney) Tet-Off CGN/CGNL1-double-KO | [5]                                        | N/A                                                                                                                                       |
| <b>Software and algorithms</b>                               |                                            |                                                                                                                                           |
| Image J                                                      | N/A                                        | Imagej.nih.gov/ij/<br>RRID: SCR_003070                                                                                                    |
| Affinity Designer                                            | N/A                                        | <a href="https://affinity.serif.com/">https://affinity.serif.com/</a><br>RRID: SCR_016952                                                 |
| Prism GraphPad                                               | N/A                                        | <a href="https://www.graphpad.com/scientific-software/prism/">https://www.graphpad.com/scientific-software/prism/</a><br>RRID: SCR_002798 |

- Sluysmans, S.; Mean, I.; Xiao, T.; Boukhatemi, A.; Ferreira, F.; Jond, L.; Mutero, A.; Chang, C.J.; Citi, S. PLEKHA5, PLEKHA6 and PLEKHA7 bind to PDZD11 to target the Menkes ATPase ATP7A to the cell periphery and regulate copper homeostasis. *Mol Biol Cell* **2021**, *32*, 1-20, doi:10.1091/mbc.E21-07-0355.
- Guerrera, D.; Shah, J.; Vasileva, E.; Sluysmans, S.; Mean, I.; Jond, L.; Poser, I.; Mann, M.; Hyman, A.A.; Citi, S. PLEKHA7 Recruits PDZD11 to Adherens Junctions to Stabilize Nectins. *J Biol Chem* **2016**, *291*, 11016-11029, doi:10.1074/jbc.M115.712935.
- Spadaro, D.; Le, S.; Laroche, T.; Mean, I.; Jond, L.; Yan, J.; Citi, S. Tension-Dependent Stretching Activates ZO-1 to Control the Junctional Localization of Its Interactors. *Curr Biol* **2017**, *27*, 3783-3795 e3788, doi:10.1016/j.cub.2017.11.014.
- Rouaud, F.; Huang, W.; Flinois, A.; Jain, K.; Vasileva, E.; Di Mattia, T.; Mauperin, M.; Parry, D.A.D.; Dugina, V.; Chaponnier, C.; et al. Cingulin and paracingulin tether myosins-2 to junctions to mechanoregulate the plasma membrane. *J. Cell Biol.* **2023**, *322*, e202208065.
- Vasileva, E.; Spadaro, D.; Rouaud, F.; King, J.M.; Flinois, A.; Shah, J.; Sluysmans, S.; Mean, I.; Jond, L.; Turner, J.R.; et al. Cingulin binds to the ZU5 domain of scaffolding protein ZO-1 to promote its extended conformation, stabilization, and tight junction accumulation. *J Biol Chem* **2022**, *298*, 101797, doi:10.1016/j.jbc.2022.101797.
